# Supplementary material for: High-fat diet induced discrepant peripheral and central nervous systems insulin resistance in APPswe/PS1dE9 and wild-type C57BL/6J mice
Source: publisher site journal article supplement (doi:10.18632/aging.202262), 2020-12-03
Supplement: Supplementary file [file aging-v13i1-202262-supplementary-material-SD1.pdf]

## SUPPLEMENTARY TABLE

Supplementary Table 1. Composition of experimental diets (g/kg).

| Nutrients in diet   | Control diet | 60% high fat diet |
|---------------------|--------------|-------------------|
| <b>Ingredient</b>   |              |                   |
| <i>Casein</i>       | 200          | 200               |
| <i>L-Cystine</i>    | 3            | 3                 |
| <i>Corn Starch</i>  | 315          | 0                 |
| <i>Maltodextrin</i> | 35           | 125               |
| <i>Sucrose</i>      | 350          | 68.8              |
| <i>Cellulose</i>    | 50           | 50                |
| <i>Mineral Mix</i>  | 45           | 45                |
| <i>Vitamin E</i>    | 0.065        | 0.065             |
| <i>Vitamin A</i>    | 0.0012       | 0.0012            |
| <i>SFA</i>          | 15.48        | 105.38            |
| <i>MUFAs</i>        | 17.09        | 112.30            |
| <i>PUFAs</i>        | 12.45        | 52.51             |
| <b>kcal %</b>       |              |                   |
| <i>Protein</i>      | 20           | 20                |
| <i>Carbohydrate</i> | 70           | 20                |
| <i>Fat</i>          | 10           | 60                |

SFA: saturated fatty acid; MUFAs: multiple unsaturated fatty acids; PUFAs: polyunsaturated fatty acids.
